# Supplementary material for: Association of N-Terminal Pro Brain Natriuretic Peptide and Long-Term Outcome in Patients With Pulmonary Arterial Hypertension: Insights From the Phase III GRIPHON Study
Source: PubMed Central journal article supplement — Circulation. 2019 May 20;139(21):2440–50. doi: 10.1161/CIRCULATIONAHA.118.039360 (PMC6530970; doi:10.1161/circulationaha.118.039360), 2019-05-20
Supplement: cir-139-2440-s001.pdf [file cir-139-2440-s001.pdf]

## **SUPPLEMENTAL MATERIAL**

This supplement has been provided by the authors to give readers additional information about their work.

Supplement to: Chin KM, Rubin LJ, Channick R, et al. Association of NT-proBNP and long-term outcome in patients with pulmonary arterial hypertension: Insights from the phase III GRIPHON study

## SUPPLEMENTAL FIGURES

**Supplemental Figure 1.** Patient disposition. Patients grouped according to N-terminal pro brain natriuretic peptide (NT-proBNP) level at baseline. Low, medium and high NT-proBNP cut-offs determined according to baseline NT-proBNP tertiles (Low: <271 ng/L; Medium: 271-1165 ng/L; High: >1165 ng/L).

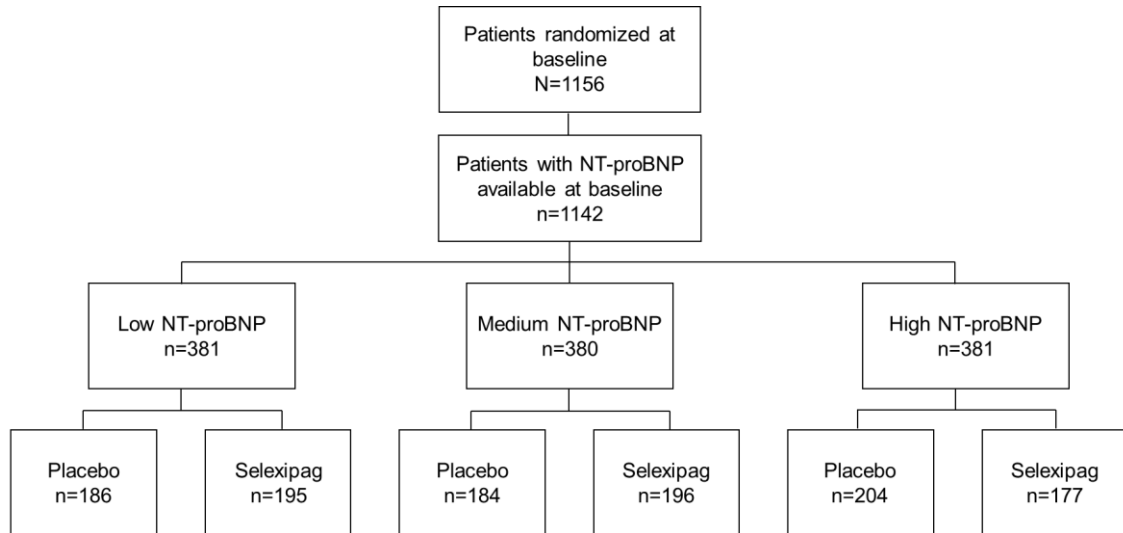

**Supplemental Figure 2:** Shift table for change in N-terminal pro brain natriuretic peptide (NT-proBNP) category from baseline to week 26. Values shown as n (%). Low, medium and high NT-proBNP cut-offs determined according to ESC/ERS guidelines thresholds (Low: <300 ng/L; Medium: 300-1400 ng/L; High: >1400 ng/L). Analyses performed only in patients who were still in the double-blind treatment at week 26 and who had an NT-proBNP value at baseline and week 26; 289 patients randomized at baseline were excluded from these analyses for the following reasons (categories are not mutually exclusive): primary endpoint event prior to week 26 (n=147), premature discontinuation of double-blind treatment prior to week 26 (n=121), missing NT-proBNP value at baseline (n=14) or at week 26 (n=239). Overall, an improvement in NT-proBNP category was reported in 76 (17.2%) patients in the selexipag arm compared with 43 (10.1%) patients in the placebo arm, and deterioration was reported in 39 (8.8%) patients in the selexipag arm compared with 57 (13.4%) patients in the placebo arm. BL indicates baseline.

|                      |           | Week 26 Low | Week 26 Medium | Week 26 High |
|----------------------|-----------|-------------|----------------|--------------|
| Selexipag<br>(n=443) | BL Low    | 157 (35.4)  | 15 (3.4)       | 2 (0.5)      |
|                      | BL Medium | 43 (9.7)    | 97 (21.9)      | 22 (5.0)     |
|                      | BL High   | 5 (1.1)     | 28 (6.3)       | 74 (16.7)    |
| Placebo<br>(n=424)   | BL Low    | 141 (33.3)  | 28 (6.6)       | 0            |
|                      | BL Medium | 25 (5.9)    | 101 (23.8)     | 29 (6.8)     |
|                      | BL High   | 0           | 18 (4.2)       | 82 (19.3)    |

- Stable Low
- Stable Med
- Stable High
- Improved
- Deteriorated

**Supplemental Figure 3.** Time from randomization to first morbidity or mortality event in subgroups defined by N-terminal pro brain natriuretic peptide (NT-proBNP) level at baseline. Low, medium and high NT-proBNP cut-offs determined according to ESC/ERS guidelines thresholds (Low: <300 ng/L; Medium: 300-1400 ng/L; High: >1400 ng/L).

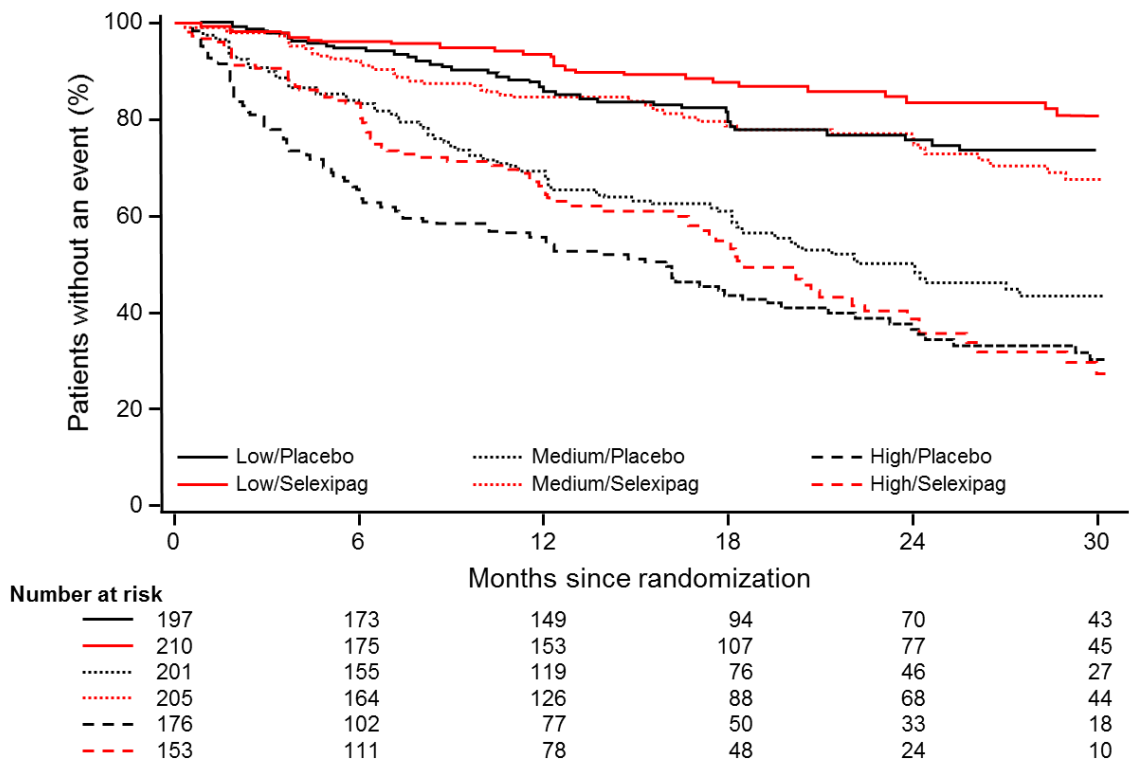

**SUPPLEMENTAL TABLES**

**Supplemental Table 1.** Treatment effect of selexipag on time from randomization to first morbidity or mortality event in subgroups defined by N-terminal pro brain natriuretic peptide (NT-proBNP) level at baseline.

|                                                       | <b>NT-proBNP category at baseline (tertiles)*</b>              |                  |                  |
|-------------------------------------------------------|----------------------------------------------------------------|------------------|------------------|
|                                                       | <b>Low</b>                                                     | <b>Medium</b>    | <b>High</b>      |
| <b>Unadjusted hazard ratio<br/>(95% CI)</b>           | 0.57 (0.34-0.94)                                               | 0.48 (0.33-0.70) | 0.73 (0.55-0.96) |
| <b>Adjusted<sup>‡</sup> hazard ratio<br/>(95% CI)</b> | 0.55 (0.33-0.92)                                               | 0.47 (0.33-0.69) | 0.77 (0.58-1.02) |
|                                                       | <b>NT-proBNP category at baseline (guidelines)<sup>†</sup></b> |                  |                  |
|                                                       | <b>Low</b>                                                     | <b>Medium</b>    | <b>High</b>      |
| <b>Unadjusted hazard ratio<br/>(95% CI)</b>           | 0.59 (0.36-0.95)                                               | 0.43 (0.30-0.61) | 0.83 (0.62-1.12) |
| <b>Adjusted<sup>‡</sup> hazard ratio<br/>(95% CI)</b> | 0.57 (0.35-0.92)                                               | 0.42 (0.30-0.60) | 0.89 (0.66-1.21) |

\*Low, medium and high NT-proBNP cut-offs determined according to baseline NT-proBNP tertiles (Low: <271 ng/L; Medium: 271-1165 ng/L; High: >1165 ng/L).

<sup>†</sup>Low, medium and high NT-proBNP cut-offs determined according to ESC/ERS guidelines thresholds tertiles (Low: <300 ng/L; Medium: 300-1400 ng/L; High: >1400 ng/L).

<sup>‡</sup>Adjusted for PAH therapy, WHO functional class, sex, age (categorized as <65 years vs ≥65 years), race, etiology, geographical location, baseline 6-minute walk distance and baseline creatinine level.

CI indicates confidence intervals.

**Supplemental Table 2.** Adverse events.

|                                                                       | NT-proBNP category at baseline |                    |                  |                    |                  |                    |
|-----------------------------------------------------------------------|--------------------------------|--------------------|------------------|--------------------|------------------|--------------------|
|                                                                       | Low                            |                    | Medium           |                    | High             |                    |
|                                                                       | Placebo<br>N=186               | Selexipag<br>N=195 | Placebo<br>N=183 | Selexipag<br>N=197 | Placebo<br>N=204 | Selexipag<br>N=177 |
| Adverse events                                                        | 1280                           | 1443               | 1292             | 1550               | 1344             | 1561               |
| Patients with ≥1 adverse events                                       | 175 (94.1)                     | 190 (97.4)         | 178 (97.3)       | 194 (98.5)         | 202 (99.0)       | 175 (98.9)         |
| Patients with ≥1 serious adverse events                               | 53 (28.5)                      | 67 (34.4)          | 89 (48.6)        | 83 (42.1)          | 128 (62.7)       | 98 (55.4)          |
| Patients with adverse events leading to discontinuation of study drug | 12 (6.5)                       | 22 (11.3)          | 11 (6.0)         | 31 (15.7)          | 18 (8.8)         | 29 (16.4)          |
| Adverse event*                                                        |                                |                    |                  |                    |                  |                    |
| Headache                                                              | 72 (38.7)                      | 140 (71.8)         | 59 (32.2)        | 128 (65.0)         | 58 (28.4)        | 102 (57.6)         |
| Diarrhea                                                              | 34 (18.3)                      | 73 (37.4)          | 41 (22.4)        | 86 (43.7)          | 35 (17.2)        | 83 (46.9)          |
| Nausea                                                                | 40 (21.5)                      | 67 (34.4)          | 35 (19.1)        | 58 (29.4)          | 32 (15.7)        | 67 (37.9)          |
| Pain in jaw                                                           | 8 (4.3)                        | 51 (26.2)          | 17 (9.3)         | 50 (25.4)          | 11 (5.4)         | 46 (26.0)          |
| Myalgia                                                               | 12 (6.5)                       | 31 (15.9)          | 11 (6.0)         | 36 (18.3)          | 10 (4.9)         | 24 (13.6)          |
| Vomiting                                                              | 13 (7.0)                       | 30 (15.4)          | 22 (12.0)        | 31 (15.7)          | 14 (6.9)         | 43 (24.3)          |
| Flushing                                                              | 13 (7.0)                       | 28 (14.4)          | 10 (5.5)         | 22 (11.2)          | 6 (2.9)          | 20 (11.3)          |
| Upper respiratory tract infection                                     | 36 (19.4)                      | 27 (13.8)          | 19 (10.4)        | 25 (12.7)          | 25 (12.3)        | 23 (13.0)          |
| Dizziness                                                             | 30 (16.1)                      | 25 (12.8)          | 30 (16.4)        | 29 (14.7)          | 23 (11.3)        | 32 (18.1)          |
| Arthralgia                                                            | 17 (9.1)                       | 25 (12.8)          | 15 (8.2)         | 25 (12.7)          | 12 (5.9)         | 12 (6.8)           |
| Pain in extremity                                                     | 15 (8.1)                       | 25 (12.8)          | 18 (9.8)         | 35 (17.8)          | 13 (6.4)         | 33 (18.6)          |
| Nasopharyngitis                                                       | 24 (12.9)                      | 23 (11.8)          | 21 (11.5)        | 25 (12.7)          | 18 (8.8)         | 24 (13.6)          |
| Cough                                                                 | 21 (11.3)                      | 22 (11.3)          | 22 (12.0)        | 14 (7.1)           | 24 (11.8)        | 20 (11.3)          |
| Fatigue                                                               | 21 (11.3)                      | 22 (11.3)          | 19 (10.4)        | 14 (7.1)           | 19 (9.3)         | 10 (5.6)           |
| Dyspnea                                                               | 34 (18.3)                      | 20 (10.3)          | 33 (18.0)        | 34 (17.3)          | 51 (25.0)        | 38 (21.5)          |
| Abdominal pain                                                        | 12 (6.5)                       | 19 (9.7)           | 8 (4.4)          | 16 (8.1)           | 13 (6.4)         | 13 (7.3)           |
| PAH                                                                   | 39 (21.0)                      | 17 (8.7)           | 65 (35.5)        | 38 (19.3)          | 100 (49.0)       | 69 (39.0)          |
| Peripheral edema                                                      | 24 (12.9)                      | 15 (7.7)           | 31 (16.9)        | 24 (12.2)          | 48 (23.5)        | 40 (22.6)          |
| Syncope                                                               | 11 (5.9)                       | 9 (4.6)            | 21 (11.5)        | 12 (6.1)           | 19 (9.3)         | 16 (9.0)           |
| Right ventricular failure                                             | 4 (2.2)                        | 6 (3.1)            | 20 (10.9)        | 6 (3.0)            | 34 (16.7)        | 33 (18.6)          |

Safety population.

Values shown are n or n (%).

Low, medium and high NT-proBNP cut-offs determined according to baseline NT-proBNP tertiles (Low: <271 ng/L; Medium: 271-1165 ng/L; High: >1165 ng/L).

\*All AEs reported for more than 10% of patients in any group. Ordered by incidence in the selexipag-treated patients with a low NT-proBNP at baseline.

AE indicates adverse event; NT-proBNP, N-terminal pro brain natriuretic peptide; PAH, pulmonary arterial hypertension.
